# Supplementary material for: Compartmentalized nodes control mitotic entry signaling in fission yeast
Source: PubMed Central journal article supplement — Mol Biol Cell. 2013 Jun 15;24(12):1872–81. doi: 10.1091/mbc.E13-02-0104 (PMC3681693; doi:10.1091/mbc.e13-02-0104), 2013-06-15
Supplement: supp_E13-02-0104v1_CombinedSupMats.pdf [file supp_E13-02-0104v1_CombinedSupMats.pdf]

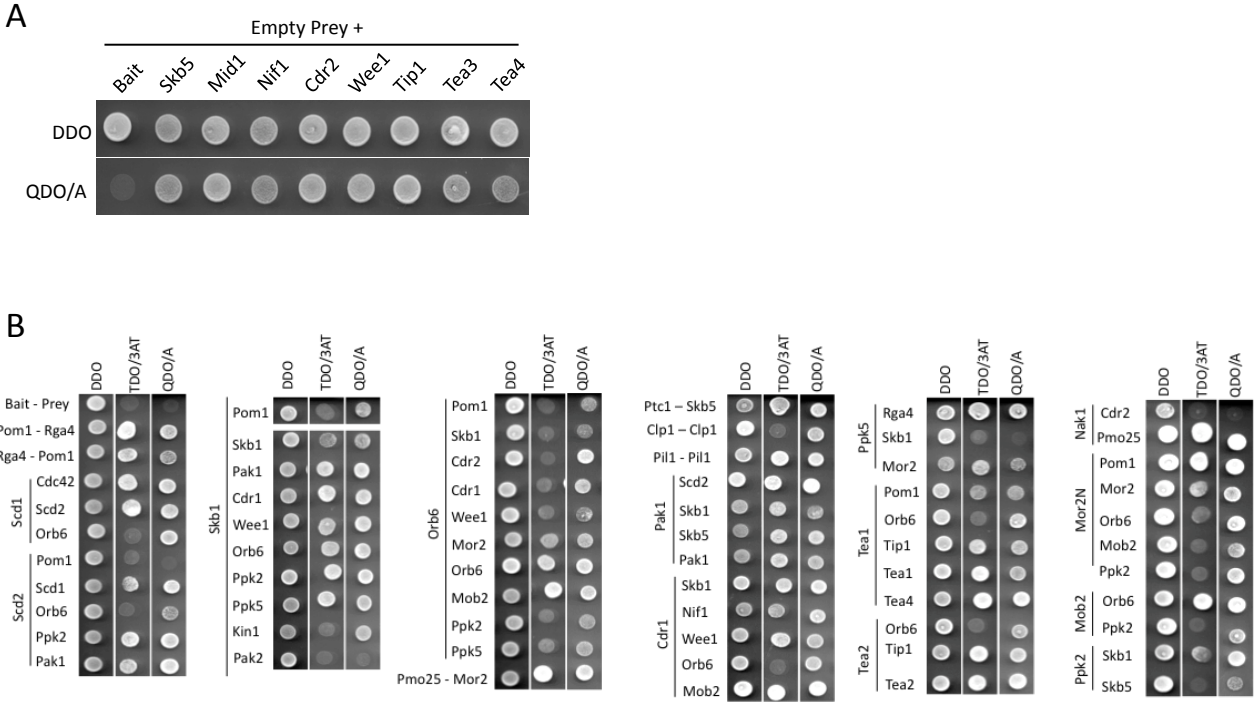

**Supplementary Figure S1.** Comprehensive pair-wise yeast two-hybrid screen. (A) Bait vectors showing auto-activation with empty prey vector. Empty bait vector was used for negative control, these auto-activating bait vectors were eliminated from the screen. (B) Verification and scoring of protein-protein interactions. Transformants were selected on double dropout (DDO) plates, and interactions were tested by growth on triple dropout + 3AT (TDO/3AT) and quadruple dropout + aureobasidin A (QDO/A) plates.

| Strain                                      | Length of cells with 2 SPB ( $\mu\text{m}$ ) |
|---------------------------------------------|----------------------------------------------|
| <i>sid4-mCherry</i>                         | 14.3 $\pm$ 0.8                               |
| <i>sid4-mCherry skb1<math>\Delta</math></i> | 12.9 $\pm$ 0.6                               |

**Supplementary Figure S2.** Length of cells from the indicated genotypes with separated SPBs, as marked by Sid4-mCherry (mean  $\pm$  s.d.; n > 50 cells for each value).

| Strain                        | Length at division ( $\mu\text{m}$ ) |
|-------------------------------|--------------------------------------|
| WT                            | $13.7 \pm 1.0$                       |
| <i>skb1-3GFP</i>              | $13.8 \pm 1.0$                       |
| <i>skb1(E422A,E431A)-3GFP</i> | $13.7 \pm 0.7$                       |

**Supplementary Figure S3.** Length of dividing, septated cells of the indicated genotypes (mean  $\pm$  s.d.;  $n > 50$  for each value). Note that cell length at division is not affected by Skb1-3GFP tag or by methyltransferase dead mutant *skb1(E422A,E431A)-3GFP*.

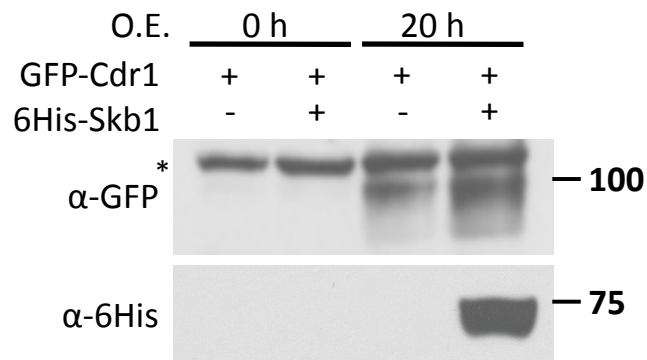

**Supplementary Figure S4.** GFP-Cdr1 levels are not reduced by co-overexpression of Skb1. Cells were induced as in Figure 3B, and whole-cell extract was probed by Western blot using the indicated antibodies. Asterisk marks nonspecific band.

| <b>strain</b>                  | <b>overexpression</b> | <b>Length at division (<math>\mu\text{m}</math>)</b> |
|--------------------------------|-----------------------|------------------------------------------------------|
| <i>WT</i>                      | <i>none</i>           | 13.5 $\pm$ 1.1                                       |
|                                | <i>cdr1</i>           | 8.1 $\pm$ 0.9                                        |
|                                | <i>skb1</i>           | 18.9 $\pm$ 2.7                                       |
| <i>nif1<math>\Delta</math></i> | <i>none</i>           | 12.0 $\pm$ 1.2                                       |
|                                | <i>cdr1</i>           | 7.9 $\pm$ 1.0                                        |
|                                | <i>skb1</i>           | 19.1 $\pm$ 2.0                                       |
| <i>pom1<math>\Delta</math></i> | <i>none</i>           | 11.7 $\pm$ 0.9                                       |
|                                | <i>cdr1</i>           | 7.9 $\pm$ 0.9                                        |
|                                | <i>skb1</i>           | 19.8 $\pm$ 2.3                                       |
| <i>cdr1<math>\Delta</math></i> | <i>none</i>           | 17.5 $\pm$ 1.5                                       |
|                                | <i>cdr1</i>           | 8.2 $\pm$ 1.0                                        |
|                                | <i>skb1</i>           | 24.1 $\pm$ 3.5                                       |
| <i>cdr2<math>\Delta</math></i> | <i>none</i>           | 18.5 $\pm$ 1.3                                       |
|                                | <i>cdr1</i>           | 8.2 $\pm$ 1.0                                        |
|                                | <i>skb1</i>           | 22.1 $\pm$ 3.4                                       |
| <i>wee1<math>\Delta</math></i> | <i>none</i>           | 8.3 $\pm$ 1.3                                        |
|                                | <i>cdr1</i>           | 8.3 $\pm$ 1.1                                        |
|                                | <i>skb1</i>           | 8.4 $\pm$ 1.1                                        |

**Supplementary Figure S5.** The indicated strains were induced to over-express the indicated genes for 20 hours at 32°C using a multicopy pREP3 plasmid. Values for cell length at division are mean  $\pm$  s.d.; n > 50 for each value.

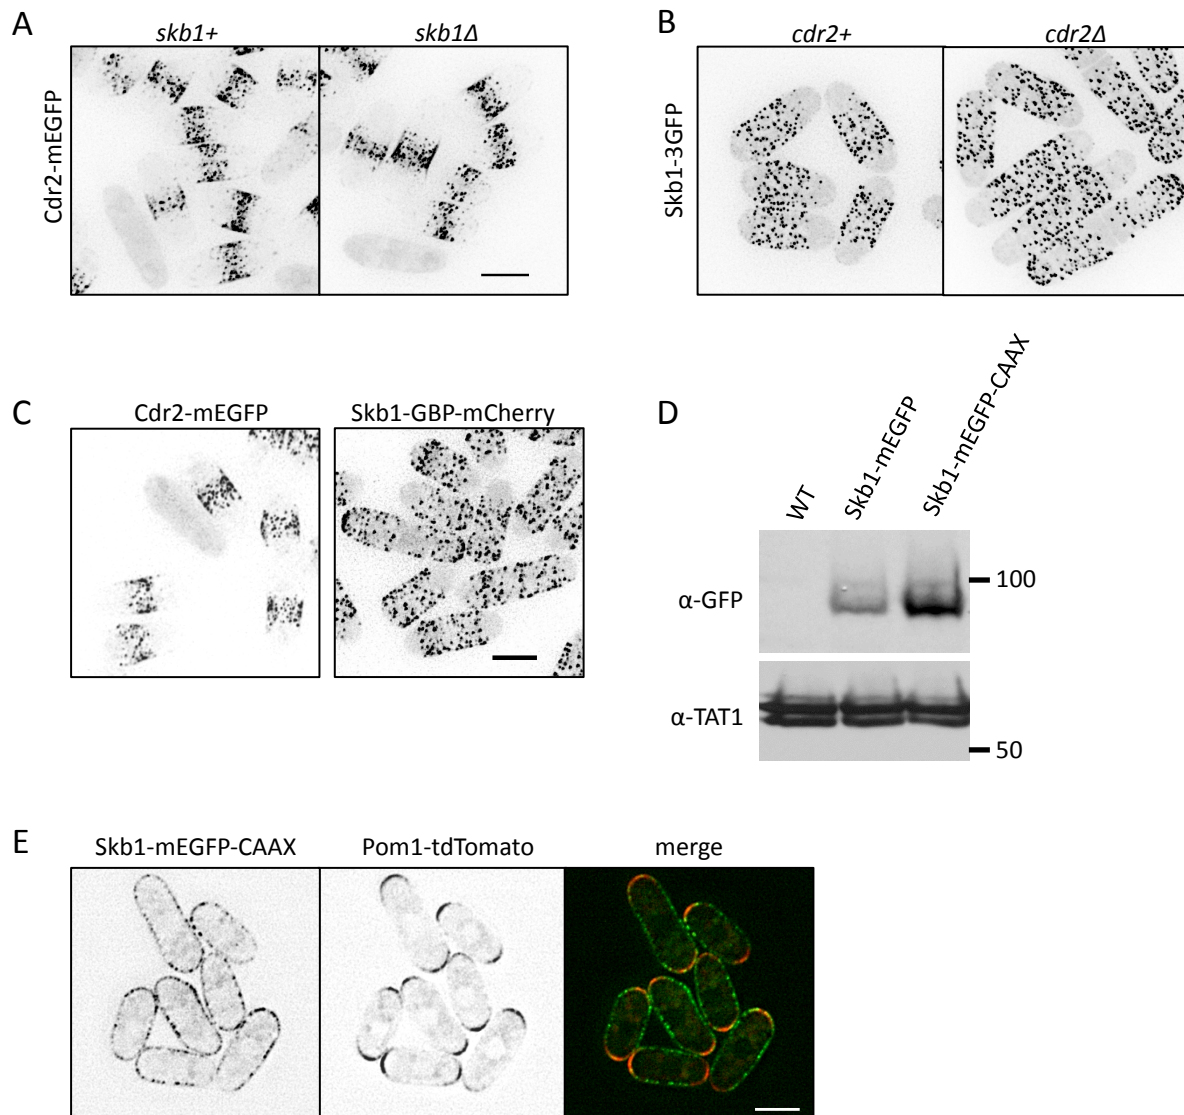

**Supplementary Figure S6.** (A) Cdr2 localization is independent of Skb1. Images are inverted maximum projections from deconvolved Z-series. (B) Skb1 localization is independent of Cdr2. Images are inverted maximum projections from deconvolved Z-series. (C) Localization of Cdr2-mEGFP and Skb1-GBP-mCherry in separate strains. Note that Skb1-GBP-mCherry localization mimics Skb1-3GFP. These tags were combined in the same strain for Figure 7B. Images are inverted maximum projections from deconvolved Z-series. (D) Western blot to compare expression levels of Skb1-mEGFP versus Skb1-mEGFP-CAAX. Whole-cell extracts were resolved by SDS-PAGE, transferred to nitrocellulose, and probed with anti-GFP antibody. Anti-TAT1 was used as a loading control. (E) Skb1-mEGFP-CAAX does not disrupt Pom1 localization at cell tips. Images are from a single deconvolved focal plane. Scale bar, 5  $\mu$ m.



9. Tatebe, H., Nakano, K., Maximo, R., and Shiozaki, K. (2008). Pom1 DYRK regulates localization of the Rga4 GAP to ensure bipolar activation of Cdc42 in fission yeast. *Curr Biol* 18, 322-330.
10. Martin, S.G., McDonald, W.H., Yates, J.R., 3rd, and Chang, F. (2005). Tea4p links microtubule plus ends with the formin for3p in the establishment of cell polarity. *Dev Cell* 8, 479-491.
11. Feierbach, B., Verde, F., and Chang, F. (2004). Regulation of a formin complex by the microtubule plus end protein tea1p. *J Cell Biol* 165, 697-707.
12. Busch, K.E., Hayles, J., Nurse, P., and Brunner, D. (2004). Tea2p kinesin is involved in spatial microtubule organization by transporting tip1p on microtubules. *Dev Cell* 6, 831-843.



**Table S2. Plasmids used in this study**

| <b>Plasmid</b> | <b>Description</b>  | <b>Note</b>   | <b>Selection</b> |
|----------------|---------------------|---------------|------------------|
| pJM587         | pGBKT7              | -             | Kan, TRP         |
| pJM588         | pGBKT7-pom1         | -             | Kan, TRP         |
| pJM589         | pGBKT7-rga4         | -             | Kan, TRP         |
| pJM591         | pGBKT7-scd1         | -             | Kan, TRP         |
| pJM592         | pGBKT7-scd2         | -             | Kan, TRP         |
| pJM594         | pGBKT7-skb1         | -             | Kan, TRP         |
| pJM595         | pGBKT7-skb5         | -             | Kan, TRP         |
| pJM596         | pGBKT7-pak1         | -             | Kan, TRP         |
| pJM597         | pGBKT7-shk2         | -             | Kan, TRP         |
| pJM598         | pGBKT7-mid1         | -             | Kan, TRP         |
| pJM599         | pGBKT7-cdr2         | C488T (L163P) | Kan, TRP         |
| pJM600         | pGBKT7-cdr1         | -             | Kan, TRP         |
| pJM601         | pGBKT7-nif1         | -             | Kan, TRP         |
| pJM602         | pGBKT7-wee1         | -             | Kan, TRP         |
| pJM603         | pGBKT7-cdc2         | -             | Kan, TRP         |
| pJM604         | pGBKT7-mor2N        | aa 1-1100     | Kan, TRP         |
| pJM605         | pGBKT7-pmo25        | -             | Kan, TRP         |
| pJM606         | pGBKT7-nak1         | -             | Kan, TRP         |
| pJM607         | pGBKT7-orb6         | -             | Kan, TRP         |
| pJM608         | pGBKT7-mob2         | -             | Kan, TRP         |
| pJM609         | pGBKT7-ppk2         | aa 1-649      | Kan, TRP         |
| pJM610         | pGBKT7-ppk5         | -             | Kan, TRP         |
| pJM611         | pGBKT7-kin1         | -             | Kan, TRP         |
| pJM612         | pGBKT7-ssp1         | -             | Kan, TRP         |
| pJM613         | pGBKT7-pil1         | -             | Kan, TRP         |
| pJM614         | pGBKT7-slm1         | -             | Kan, TRP         |
| pJM616         | pGBKT7-tip1         | -             | Kan, TRP         |
| pJM617         | pGBKT7-mod5         | -             | Kan, TRP         |
| pJM618         | pGBKT7-tea1         | -             | Kan, TRP         |
| pJM619         | pGBKT7-tea2         | -             | Kan, TRP         |
| pJM620         | pGBKT7-tea3         | -             | Kan, TRP         |
| pJM621         | pGBKT7-tea4         | -             | Kan, TRP         |
| pJM622         | pGBKT7-for3         | -             | Kan, TRP         |
| pJM623         | pGBKT7-bud6         | -             | Kan, TRP         |
| pJM624         | pGBKT7-par1         | -             | Kan, TRP         |
| pJM626         | pGBKT7-SPBC29B5.04C | -             | Kan, TRP         |
| pJM627         | pGBKT7-clp1         | -             | Kan, TRP         |
| pJM628         | pGBKT7-ptc1         | -             | Kan, TRP         |
| pJM629         | pGBKT7-ksg1         | -             | Kan, TRP         |
| pJM630         | pGADT7              | -             | Amp, LEU         |
| pJM631         | pGADT7-pom1         | -             | Amp, LEU         |
| pJM632         | pGADT7-rga4         | -             | Amp, LEU         |
| pJM633         | pGADT7-cdc42        | -             | Amp, LEU         |
| pJM634         | pGADT7-scd1         | -             | Amp, LEU         |

|        |                                                    |                 |          |
|--------|----------------------------------------------------|-----------------|----------|
| pJM635 | pGADT7-scd2                                        | -               | Amp, LEU |
| pJM637 | pGADT7-skb1                                        | -               | Amp, LEU |
| pJM638 | pGADT7-skb5                                        | -               | Amp, LEU |
| pJM639 | pGADT7-pak1                                        | -               | Amp, LEU |
| pJM640 | pGADT7-shk2                                        | -               | Amp, LEU |
| pJM641 | pGADT7-mid1                                        | -               | Amp, LEU |
| pJM642 | pGADT7-cdr2                                        | -               | Amp, LEU |
| pJM643 | pGADT7-cdr1                                        | C749A (P250Q)   | Amp, LEU |
| pJM644 | pGADT7-nif1                                        | -               | Amp, LEU |
| pJM645 | pGADT7-wee1                                        | -               | Amp, LEU |
| pJM646 | pGADT7-cdc2                                        | -               | Amp, LEU |
| pJM647 | pGADT7-mor2                                        | A5075G (T1692A) | Amp, LEU |
| pJM648 | pGADT7-pmo25                                       | -               | Amp, LEU |
| pJM650 | pGADT7-orb6                                        | -               | Amp, LEU |
| pJM651 | pGADT7-mob2                                        | -               | Amp, LEU |
| pJM652 | pGADT7-ppk2                                        | -               | Amp, LEU |
| pJM653 | pGADT7-ppk5                                        | -               | Amp, LEU |
| pJM654 | pGADT7-kin1                                        | -               | Amp, LEU |
| pJM655 | pGADT7-ssp1                                        | -               | Amp, LEU |
| pJM656 | pGADT7-pil1                                        | -               | Amp, LEU |
| pJM657 | pGADT7-slm1                                        | -               | Amp, LEU |
| pJM658 | pGADT7-dis1                                        | -               | Amp, LEU |
| pJM659 | pGADT7-tip1                                        | -               | Amp, LEU |
| pJM660 | pGADT7-mod5                                        | -               | Amp, LEU |
| pJM661 | pGADT7-tea1                                        | -               | Amp, LEU |
| pJM662 | pGADT7-tea2                                        | -               | Amp, LEU |
| pJM663 | pGADT7-tea3                                        | -               | Amp, LEU |
| pJM664 | pGADT7-tea4                                        | -               | Amp, LEU |
| pJM665 | pGADT7-for3                                        | -               | Amp, LEU |
| pJM666 | pGADT7-bud6                                        | -               | Amp, LEU |
| pJM667 | pGADT7-par1                                        | -               | Amp, LEU |
| pJM668 | pGADT7-par2                                        | -               | Amp, LEU |
| pJM669 | pGADT7-SPBC29B5.04C                                | -               | Amp, LEU |
| pJM670 | pGADT7-clp1                                        | -               | Amp, LEU |
| pJM671 | pGADT7-ptc1                                        | -               | Amp, LEU |
| pJM672 | pGADT7-ksg1                                        | -               | Amp, LEU |
| pJM705 | pGADT7-cdr1 (1-258)                                | -               | Amp, LEU |
| pJM706 | pGADT7-cdr1 (259-593)                              | -               | Amp, LEU |
| pJM210 | pREP3x                                             | -               | Amp, LEU |
| pJM416 | pREP3x-6His-Cdr1                                   | -               | Amp, LEU |
| pJM482 | pREP3x-6His-Skb1                                   | -               | Amp, LEU |
| pJM684 | pJK148-Pskb1-skb1-3GFP-Tskb1-KanR                  | -               | Amp      |
| pJM763 | pJK148-Pskb1-skb1(E422A,E431A)-<br>3GFP-Tskb1-KanR | SDM of pJM684   | Amp      |

**Table S3. Strains used in this study**

| <b>Strain</b> | <b>Genotype</b>                                                 | <b>Source</b>  |
|---------------|-----------------------------------------------------------------|----------------|
| JM14          | <i>cdc25-22 h+</i>                                              | lab collection |
| JM186         | <i>pom1Δ::ura4+ ura4-D18 h+</i>                                 | lab collection |
| JM199         | <i>cdr2Δ::ura4+ ura4-D18 h+</i>                                 | lab collection |
| JM228         | <i>wee1-50 h+</i>                                               | lab collection |
| JM366         | <i>972 h-</i>                                                   | lab collection |
| JM454         | <i>cdr1-3GFP::kanMX6 h-</i>                                     | lab collection |
| JM482         | <i>nim1Δ::kanMX6 leu1-32 h+</i>                                 | lab collection |
| JM488         | <i>skb1-3GFP::kanR h-</i>                                       | This study     |
| JM496         | <i>kanR-P41-nmt1-GFP-cdr1 ULA- h-</i>                           | This study     |
| JM497         | <i>kanR-P81-nmt1-GFP-cdr1 ULA-</i>                              | This study     |
| JM499         | <i>skb1-3GFP::kanR cdr2-mCherry::natR ade6-M216</i>             | This study     |
| JM504         | <i>skb1-3GFP::kanR cdr2Δ::ura4+ ura4-D18</i>                    | This study     |
| JM548         | <i>kanR-P41nmt1-GFP-wee1 leu1-32 ura4-D18 h-</i>                | This study     |
| JM554         | <i>cdr2Δ::kanR h-</i>                                           | lab collection |
| JM570         | <i>cdr1Δ::natR h-</i>                                           | This study     |
| JM618         | <i>cdc25-22 pom1Δ::ura4-D18 ura4-D18</i>                        | lab collection |
| JM623         | <i>cdr2-mEGFP::kanR skb1Δ::ura4+ ura4-D18 leu1-32 ade6-M21X</i> | This study     |
| JM636         | <i>skb1Δ::ura4+ cdr1Δ::natR ura4-D18</i>                        | This study     |
| JM673         | <i>cdr2-mEGFP::kanR leu1-32 h-</i>                              | This study     |
| JM777         | <i>wee1Δ::ura4+ ura4-D18 leu1-32 h-</i>                         | lab collection |
| JM837         | <i>leu1-32 h-</i>                                               | lab collection |
| JM906         | <i>skb1Δ::kanMX6 h+</i>                                         | This study     |
| JM909         | <i>skb1Δ::ura4+ ura4-D18 leu1-32 h+</i>                         | This study     |
| JM918         | <i>nif1Δ::natR h+</i>                                           | This study     |
| JM923         | <i>cdc25-22 skb1Δ::kanR</i>                                     | This study     |
| JM937         | <i>pom1Δ::kanMX6 ura4-D18 leu1-32 ade6-M216 h+</i>              | lab collection |
| JM963         | <i>cdc25-22 nif1Δ::natR h+</i>                                  | This study     |
| JM964         | <i>cdc25-22 nif1Δ::natR skb1Δ::kanR h+</i>                      | This study     |
| JM1005        | <i>skb1-3GFP::kanR pom1Δ::ura4+ ura4-D18</i>                    | This study     |
| JM1006        | <i>skb1-3GFP::kanR tea1Δ::ura4+ ura4-D18</i>                    | This study     |
| JM1691        | <i>cdc25-22 skb1Δ::kanR pom1Δ::ura4-D18 h+</i>                  | This study     |
| JM1721        | <i>skb1Δ::natR h-</i>                                           | This study     |
| JM1862        | <i>skb1Δ::natR pom1Δ::ura4+ ura4-D18</i>                        | This study     |
| JM1872        | <i>skb1Δ::natR cdr2Δ::ura4+ ura4-D18</i>                        | This study     |
| JM1932        | <i>skb1-3GFP::natR pAct1-Lifeact-mCherry::leu+</i>              | This study     |
| JM1974        | <i>skb1-GBP-mCherry::hphR h+</i>                                | This study     |
| JM1995        | <i>cdr2-mEGFP::kanMX6 skb1-GBP-mCherry::hphR h+</i>             | This study     |
| JM2025        | <i>skb1(E422,431A)-3GFP::kanR ura4-D18 leu1-32 h+</i>           | This study     |
| JM2072        | <i>cdr2Δ::ura4+ ura4-D18 leu1-32 h+</i>                         | lab collection |
| JM2325        | <i>skb1-mEGFP::kanR h-</i>                                      | This study     |
| JM2337        | <i>skb1-mEGFP-caax::natR h-</i>                                 | This study     |
| JM2399        | <i>skb1-mEGFP-caax::natR cdr2-mCherry::natR</i>                 | This study     |
| JM2622        | <i>pom1-tdTomato::natR skb1-mEGFP-caax::natR ura4-D18</i>       | This study     |

JM2624 *skb1Δ::natR wee1-50*

This study

JM2625 *nif1Δ::natR leu1-32*

This study

---
